# Supplementary material for: TiO2 nanocrystals shell layer on highly conducting indium tin oxide nanowire for photovoltaic devices
Source: Royal Society of Chemistry journal article supplement (doi:10.1039/c3nr33153a), 2013-01-01
Supplement: c3nr33153a.pdf [file c3nr33153a.pdf]

## Supplementary Information

# TiO<sub>2</sub> Shell Layer on Highly Conducting Indium Tin Oxide Nanowire for Photovoltaic Devices

Hyun Soo Han,<sup>a</sup> Ju Seong Kim,<sup>a</sup> Dong Hoe Kim,<sup>a</sup> Gil Sang Han,<sup>b</sup> Hyun Suk Jung,<sup>b</sup> Jun Hong Noh,<sup>\*c</sup> and Kug Sun Hong<sup>\*a</sup>

<sup>a</sup> WCU Hybrid Materials Program, Department of Materials Science & Engineering, Seoul National University, Seoul 151-742, Korea.

<sup>b</sup> School of Advanced Materials Science and Engineering, Sung Kyun Kwan University, Suwon 440-746, Korea.

<sup>c</sup> Division of Advanced Materials, Korea Research Institute of Chemical Technology, Daejeon 305-600, Korea.

Corresponding author; E-mail: [jhnoh@kriict.re.kr](mailto:jhnoh@kriict.re.kr) (Jun Hong Noh),  
[kshongss@plaza.snu.ac.kr](mailto:kshongss@plaza.snu.ac.kr) (Kug Sun Hong)

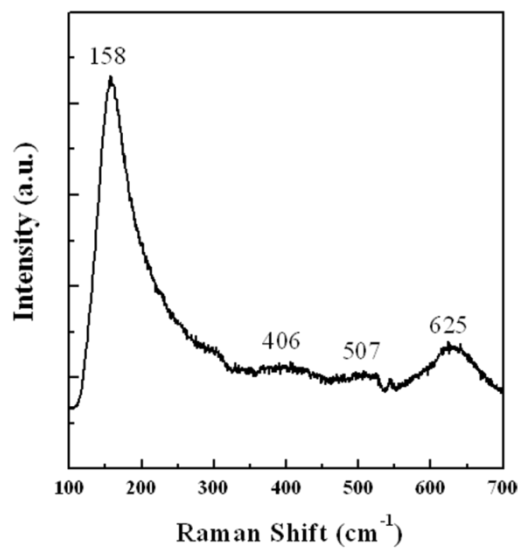

Fig. S1 Raman spectrum of the as-prepared TiO<sub>2</sub> shell layer.

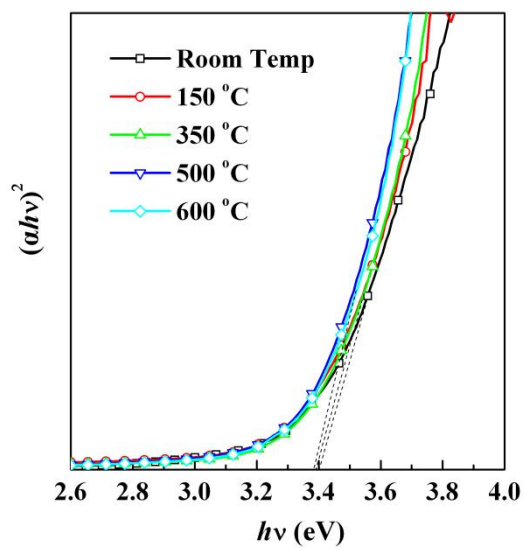

Fig. S2 Tauc plot of the TiO<sub>2</sub> shell layer for optical band gap.

The sizes of TiO<sub>2</sub> NCs with various annealing temperatures are obtained by following Scherrer equation,

$$t = \frac{0.9\lambda}{B \cos \theta_B} \quad (\text{eq. S1})$$

where  $t$  is the size of crystallite,  $\lambda$  is the wavelength of incident X-rays,  $B$  is the line broadening at half the maximum intensity (FWHM) in radians and  $\theta_B$  is the center angle of the peak.

|        | $\lambda(\text{nm})$ | $B$ (rad) | $\theta_B$ | Size (nm) |
|--------|----------------------|-----------|------------|-----------|
| 150 °C | 0.1540               | 0.028     | 12.65      | 5.0       |
| 350 °C | 0.1540               | 0.019     | 12.65      | 7.3       |
| 500 °C | 0.1540               | 0.012     | 12.65      | 11.4      |
| 600 °C | 0.1540               | 0.009     | 12.65      | 15.9      |

**Table. S1** Parameters for Scherrer equation and calculated particle size of TiO<sub>2</sub> shell layers with different annealing temperatures

An electrochemical workstation (Zennium, Zahner) with an attached frequency response analyzer and a light-emitting diode (667 nm) was utilized for the intensity-modulated photovoltage spectroscopy (IMVS) study.

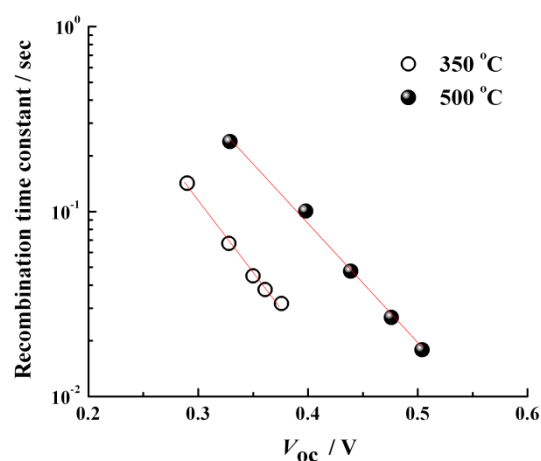

**Fig. S3** The electron recombination (IMVS) time constant as a function of the open-circuit voltage for ITO-TiO<sub>2</sub> core-shell nanowire array DSSCs with annealing temperatures of 350 °C and 500 °C

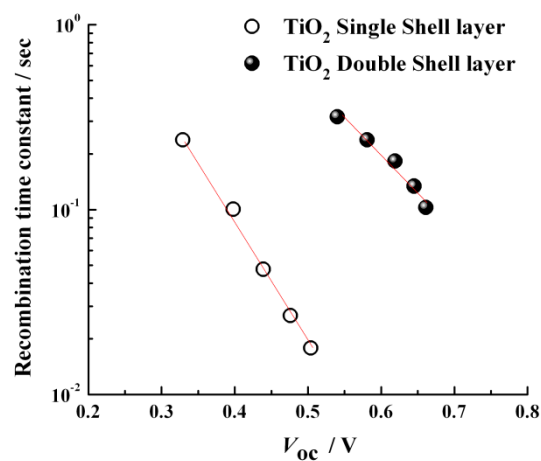

**Fig. S4** The electron recombination (IMVS) time constant as a function of the open-circuit voltage for ITO-TiO<sub>2</sub> core-shell nanowire array DSSCs TiO<sub>2</sub> single shell layer and double shell layer.
